# Supplementary material for: A workflow for genome-wide mapping of archaeal transcription factors with ChIP-seq
Source: PubMed Central journal article supplement — Nucleic Acids Res. 2012 Feb 9;40(10):e74. doi: 10.1093/nar/gks063 (PMC3378898; doi:10.1093/nar/gks063), 2012-02-09
Supplement: supp_gks063_nar-02547-met-n-2011-File010.pdf [file supp_gks063_nar-02547-met-n-2011-File010.pdf]

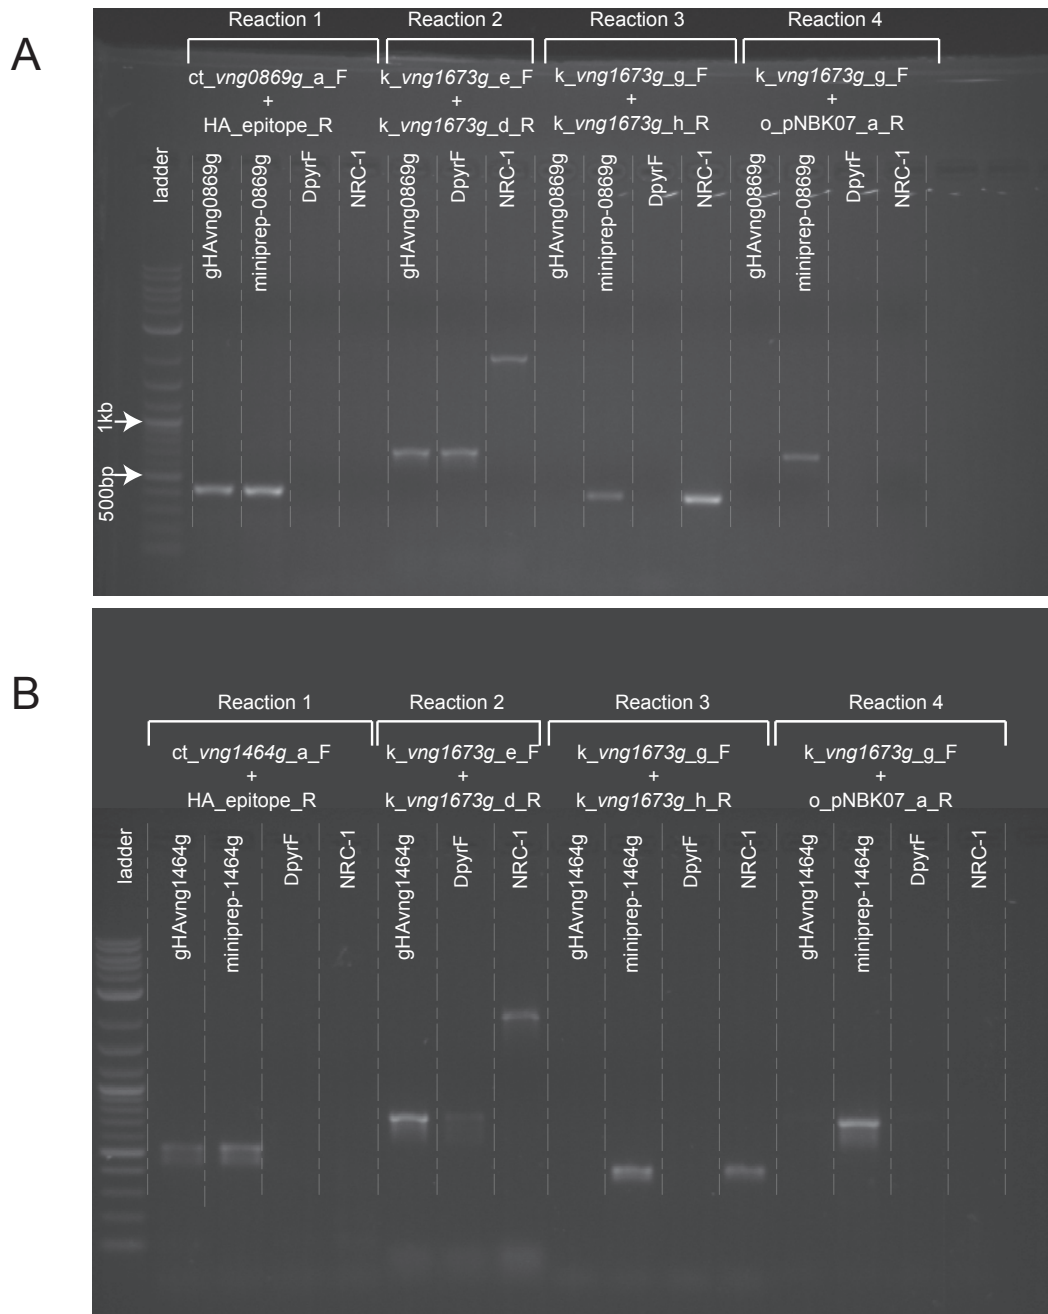

**Supplementary Figure 1.** PCR verifications of C-terminal HA epitope tagging of chromosomally integrated **(A)** *tfd* target gene and **(B)** *bat* target gene. Primers are described in Supplemental Figure 2 and sequences provided in Supplemental Table 1. Reactions 1-4 are described below and were run on the successful recombinant strain a mini-prepped sample of the recombinant plasmid used to prepare the strain, the  $\Delta$ *pyrF* parent strain and the wild-type *Hb*. NRC-1 strain. **Reaction 1:** PCR primers ct\_gene\_of\_interest\_a\_F and HA\_epitope\_R are used to amplify a fragment of the target gene that includes the HA-epitope. This verifies either chromosomal tagging or the presence of residual tagging vector. **Reaction 2:** PCR primers k\_vng1673g\_e\_F and k\_vng1673g\_d\_R that flank the chromosomally encoded *pyrF* gene are used to amplify across the *pyrF* locus. This reaction should yield a 2050bp product when *Hb*. NRC-1 genomic DNA is used as template and a 712bp when *Hb*. NRC-1  $\Delta$ *pyrF* strain genomic DNA is used as template. This reaction verifies that the absence of *pyrF* gene reintegration into the *Hb*. NRC-1  $\Delta$ *pyrF* chromosome. **Reaction 3:** PCR primers k\_vng1673g\_g\_F and k\_vng1673g\_h\_R are used to amplify a region 465bp upstream of the *pyrF* stop codon to 70bp down stream of the *pyrF* stop codon. This final reaction should yield no product in the *Hb*. NRC-1  $\Delta$ *pyrF* strain and its derivatives. A 535bp product is formed in *Hb*. NRC-1 and the pNBK07 and pRSK01 plasmids. This reaction confirms that the plasmid is absent and that the *pyrF* gene has not reintegrated in *Hb*. NRC-1  $\Delta$ *pyrF* background. **Reaction 4:** PCR primers k\_vng1673g\_g\_F and o\_pNBK07\_a\_R are used to amplify a segment of the pNBK07 or pRSK01 encoded *pyrF* gene. The absence of product, in combination a product when the same PCR primers are used with in plasmid containing control reaction, further confirms loss of the plasmid.

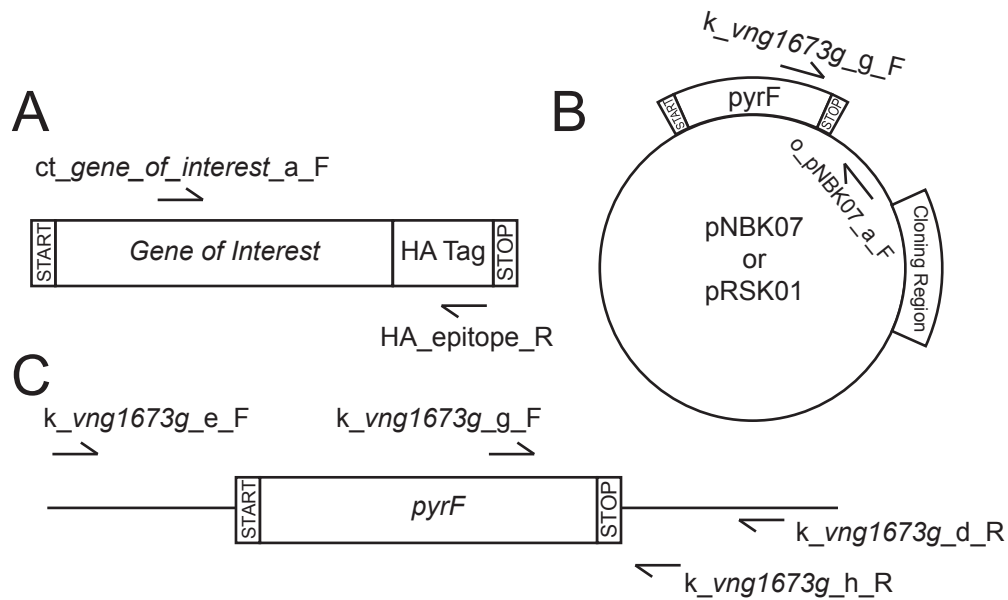

**ct\_gene\_of\_interest\_a\_F**: 500bp upstream from stop codon of gene of interest  
**HA\_epitope\_R**: HA-tag specific primer  
**k\_vng1673g\_d\_R**: 500bp downstream from the *pyrF* stop codon  
**k\_vng1673g\_e\_F**: 750bp upstream from the *pyrF* start codon  
**k\_vng1673g\_g\_F**: 465bp upstream from the *pyrF* stop codon  
**k\_vng1673g\_h\_R**: 70bp downstream from the *pyrF* stop codon  
**o\_pNBK07\_a**: 219bp downstream from the *pyrF* stop codon

**Supplementary Figure 2. A-C.** Schematic of the binding locations of the primers used in this study for screening and construction of strains. In the vicinity of the **A)** gene of interest or target gene **B)** plasmid **C)** *pyrF* locus in the chromosome. Primer sequences are provided in Supplemental Information.

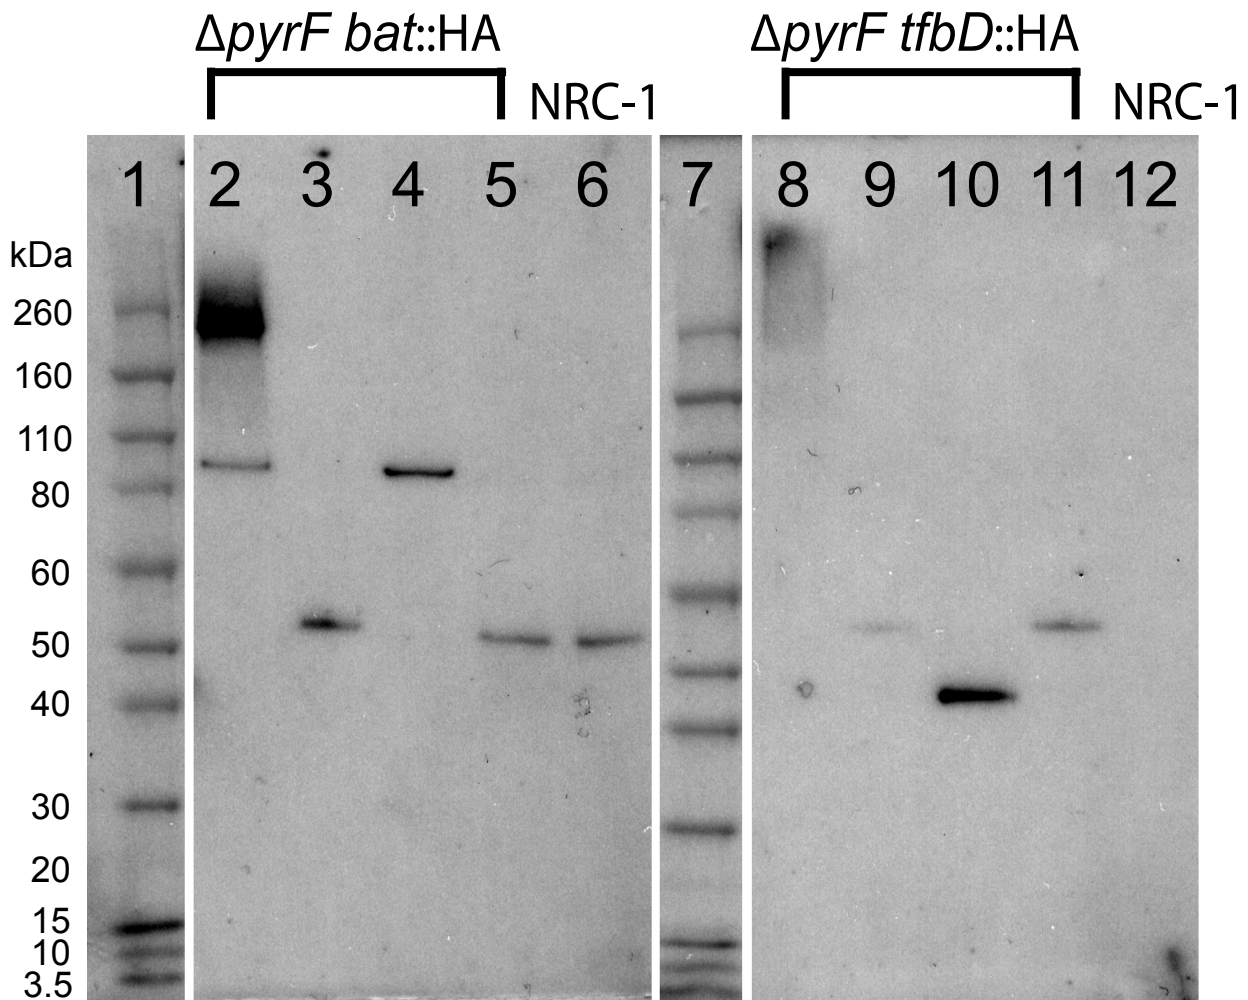

**Supplementary Figure 3.** Western blot of ChIP and IP reactions from  $\Delta pyrF bat::HA$  strain (2-5), and  $\Delta pyrF tfbD::HA$  strain (8-11). Lanes 1 and 7 contain Invitrogen Novex Sharp Pre-Stained Protein Standards (LC5800). ChIP reactions (2, 8) and unfixed IP reactions (4, 10) produce significant enrichment of the target protein which could not be observed in the whole cell extract, either fixed (3, 9) or unfixed (5, 11). The *Halobacterium salinarum* NRC-1 strain without any introduced HA-epitopes was found to have no IP-enriched proteins (12), though a band was detected in the unfixed whole cell extract (6). This band likely results from a native protein with an epitope similar to that of HA. This band was observed in all other whole cell extracts (3,5,9,11); however we note that the IP reaction was of sufficient stringency to remove this artifact as this band is not detected in any of the ChIP or IP samples. Contents of each lane are summarized again below:

1. Invitrogen Novex Sharp Pre-Stained Protein Standards (LC5800)
2.  $\Delta pyrF bat::HA$  strain ChIP
3.  $\Delta pyrF bat::HA$  strain formaldehyde-fixed Whole Cell Extract (WCE)
4.  $\Delta pyrF bat::HA$  strain IP
5.  $\Delta pyrF bat::HA$  strain unfixed WCE
6. *Hb. NRC-1* strain unfixed WCE
7. Invitrogen Novex Sharp Pre-Stained Protein Standards (LC5800)
8.  $\Delta pyrF tfbD::HA$  strain ChIP
9.  $\Delta pyrF tfbD::HA$  strain formaldehyde-fixed Whole Cell Extract (WCE)
10.  $\Delta pyrF tfbD::HA$  strain IP
11.  $\Delta pyrF tfbD::HA$  strain unfixed WCE
12. *Hb. NRC-1* strain IP

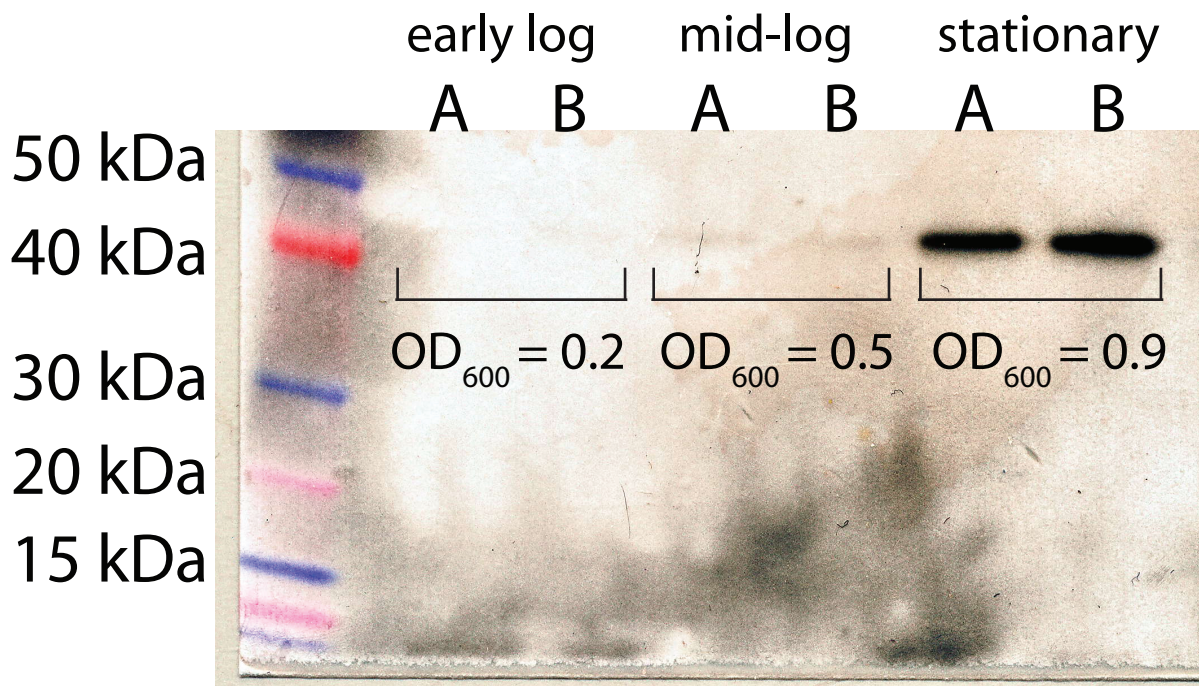

**Supplementary Figure 4.** The chromosomally integrated epitope tagged target gene *tfbD::HA* is conditionally expressed in the recombinant strain  $\Delta\text{pyrF } tfbD::HA$ . The increase in abundance of the TfbD protein in stationary phase ( $OD_{600} = 0.9$ ) is consistent with the accumulation of *tfbD* transcript previously documented for wild-type strains (Facciotti et al. 2007).

Figure shows a Western blot of two biological replicate cultures A and B (two flasks grown side by side).  $3.5 \times 10^8$  cells were harvested at each time point and immunoprecipitated as described in Materials and Methods. Immunoprecipitated sample was mixed with 6x Loading Buffer and loaded directly onto PAGE gel. Protein was transferred to PVDF membrane, blocked with 0.5% casein and probed with HA-HRP conjugated antibody. Membrane was exposed to radiography paper for 20 mins (shown above). Increasing exposure to 9 hours (not shown) did not increase the intensity of the faint bands seen at 20 minutes. Negative controls (IPs run without antibody and whole cell samples that are not shown) displayed no visible bands. Quantitative measurements of the bands in the image above (shown in the table below) were calculated using ImageJ Software in reference to  $OD_{600} 0.90$ , replicate A and are shown on a scale of 0 to 100.

| <b>OD<sub>600</sub></b> | <b>Replicate</b> | <b>Intensity</b> |
|-------------------------|------------------|------------------|
| 0.23                    | A                | Not detected     |
| 0.23                    | B                | 0.5              |
| 0.55                    | A                | 4.7              |
| 0.55                    | B                | 5.9              |
| 0.90                    | A                | 83.8             |
| 0.90                    | B                | 100              |



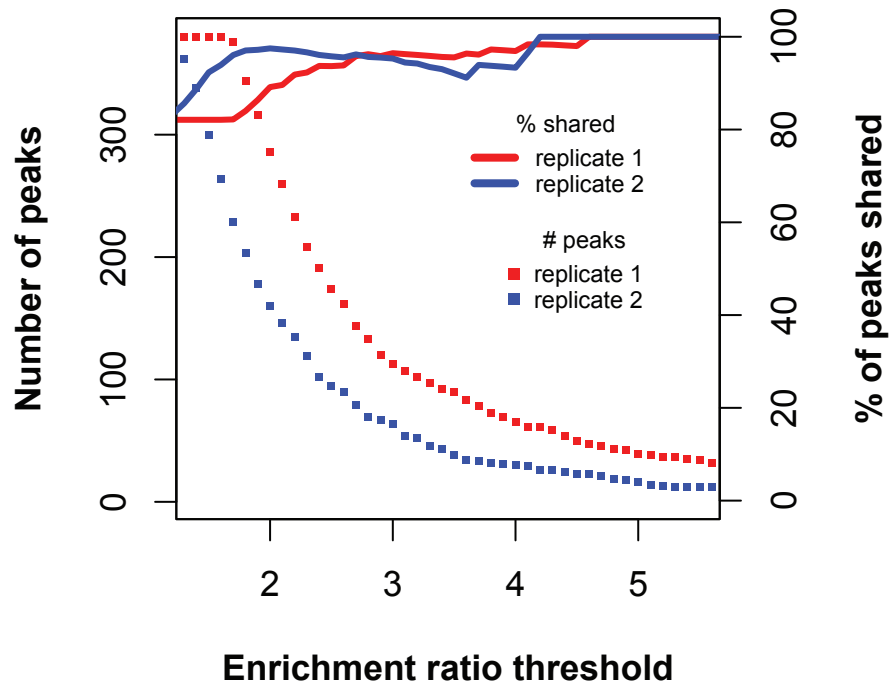

**Supplementary Figure 5.** For each biological replicate of the TfbD ChIP-seq experiment, the full peak lists were examined at increasingly stringent different enrichment ratios. Each of these increasing stringency datasets was examined for the number of predicted binding sites (squares, left y-axis) and the percentage of predicted binding sites that were shared with the full dataset of the biological replicate (solid lines, right axis).

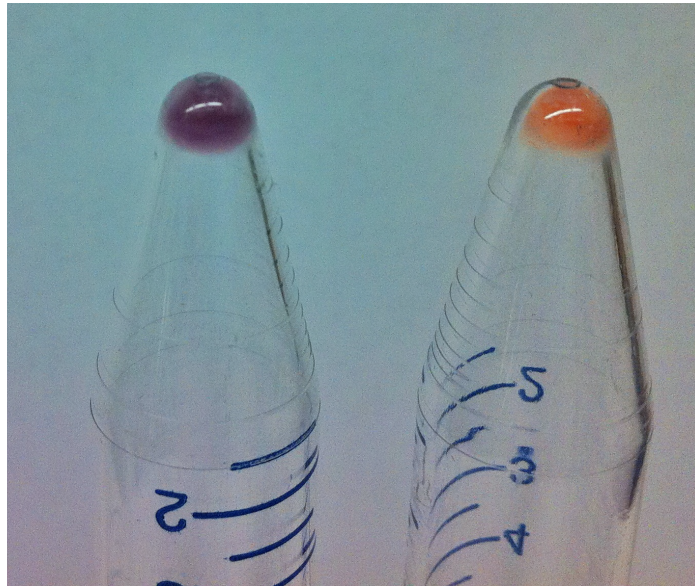

**SD20 with plasmid  
expressed Bat-cHA**

**SD20**

**Supplementary Figure 6.** Bat protein with a c-terminal HA epitope does not impede the function of the protein. SD20 is a bat knockout strain with light pink color (on right) due the absence of bacteriorhodopsin production (46). When SD20 is transformed with a plasmid expressing cHA-tagged Bat, the cells become purple from bacteriorhodopsin production induced by the engineered Bat protein (at left). Cell pellets are from 12 mL of stationary phase cultures.

**Supplementary Table 1.** Oligonucleotides used in this study.

| <b>Oligo Name</b> | <b>Sequence 5' to 3'</b>                                   |
|-------------------|------------------------------------------------------------|
| ct_vng1464g_a_F   | CCCAGGCGGTCGTCGACACC                                       |
| ct_vng1464g_b_R   | TCACGCGTAGTCCGGGACGTCGTACGGGTACGCCTCCTCGA<br>AGAACGCGCCGAC |
| ct_vng1464g_c_F   | GCGTACCCGTACGACGTCCCGGACTACGCGTGACGCGGGC<br>CACACGCCGGCTGT |
| ct_vng1464g_d_R   | CCAACTCCACACCACTCATCC                                      |
| ct_vng0869g_a_F   | GCCGCCGCGAGGCAGGCAAA                                       |
| ct_vng0869g_b_F   | GCGTACCCGTACGACGTCCCGGACTACGCGTAACCCATATT<br>CGGGGCGTC     |
| ct_vng0869g_c_R   | TTACGCGTAGTCCGGGACGTCGTACGGGTACGCCGCTTCCA<br>CGCCGGGTTC    |
| ct_vng0869g_d-2_R | CGGCGAATACCACTACCAGG                                       |
| o_pNBK07_a_R      | GAGGGTACCAGAGCTCACCTAGGTA                                  |
| k_vng1673g_d_R    | GGTCCCGGGACCGCCCCCG                                        |
| k_vng1673g_e_F    | GGGGACGTGGCCGCGACGTT                                       |
| k_vng1673g_g_F    | ATCACCGTCAACCCGTACCTC                                      |
| k_vng1673g_h_R    | CCGTGTTCCGCCGCGAAGATG                                      |
| HA_epitope_R      | GCGTAGTCCGGGACGTCGTACGG                                    |
| m13F              | GTAAAACGACGGCCAG                                           |
| m13R              | CAGGAAACAGCTATGAC                                          |
| pNBK07 F          | GGCGCGACAGATCGAGCAGA                                       |
| pNBK07 R          | GGGATGTGCTGCAAGGCGAT                                       |
| ccdB500F          | CTACCTATTCATATACGATA                                       |
| ccdB500R          | TTCACCATAATGAAATAAGA                                       |

**Supplementary Table 2.** Strains and plasmids used in this study

| Name                                 | Reference                | Purpose                                                                                                                                              |
|--------------------------------------|--------------------------|------------------------------------------------------------------------------------------------------------------------------------------------------|
| <i>Hb. salinarum</i> NRC-1           | Gift from Ford Doolittle | Wild type strain                                                                                                                                     |
| $\Delta$ <i>pyrF</i>                 | 17                       | Uracil auxotroph                                                                                                                                     |
| <i>tfbD::HA</i> $\Delta$ <i>pyrF</i> | This study               | Uracil auxotroph, <i>tfbD</i> with C-terminal HA epiopie fusion                                                                                      |
| <i>bat::HA</i> $\Delta$ <i>pyrF</i>  | This study               | Uracil auxotroph, <i>bat</i> with C-terminal HA epiopie fusion                                                                                       |
|                                      |                          |                                                                                                                                                      |
| pNBK07                               | 17, gift from N. Baliga  | 5-FOA counter selection, mevinolin resistance, can be used for targeted gene deletion                                                                |
| pRSK01                               | This study               | Modification of pNBK07 for Gateway ligation-independent cloning of segments of DNA suitable for chromosomal modification by homologous recombination |

**Supplementary Table 3.** Quantities of different solutions used for the scaled down ChIP reactions with few numbers of cells.

| # of cells harvested | Lysis Buffer (mL) | Size of Tube (mL) | DYNABEADS added ( $\mu$ L) | PBS/BSA to Resuspend DYNABEADS ( $\mu$ L) | ANTIBODY ( $\mu$ g) |
|----------------------|-------------------|-------------------|----------------------------|-------------------------------------------|---------------------|
| 1.75E+10             | 1.6               | 15                | 30                         | 30                                        | 1                   |
| 8.75E+09             | 0.8               | 15                | 25                         | 15                                        | 0.5                 |
| 3.50E+09             | 0.3               | 1.5               | 10                         | 6                                         | 0.2                 |
| 1.75E+09             | 0.3               | 1.5               | 10                         | 6                                         | 0.2                 |
| 3.50E+08             | 0.3               | 1.5               | 10                         | 6                                         | 0.2                 |



**Supplementary Table 4.** Multiplexing sequence barcodes used in this study. Barcode sequence was at the 3' end of all sequence reads.

| <b>Name</b> | <b>sequence</b> |
|-------------|-----------------|
| barcode 1   | TGCGTT          |
| barcode 2   | TAACTT          |
| barcode 3   | ACGGCT          |
| barcode 4   | GAGCCT          |
| barcode 5   | AAGAAT          |
| barcode 6   | ACCTGG          |
| barcode 7   | CTCTTG          |
| barcode 8   | TCTTAG          |
| barcode 9   | CTAATC          |
| barcode 10  | GGATGC          |
| barcode 11  | GCTGGC          |
| barcode 12  | GGTACC          |
